# Supplementary material for: Exploring dehydration mechanisms and conductivity optimization in Li3InCl6·xH2O via in situ synchrotron techniques
Source: Royal Society of Chemistry journal article supplement (doi:10.1039/d4ta07426b), 2024-12-17
Supplement: d4ta07426b1.pdf [file d4ta07426b1.pdf]

# Supporting Information

## Exploring Dehydration Mechanisms and Conductivity Optimization in $\text{Li}_3\text{InCl}_6 \cdot x\text{H}_2\text{O}$ via In-Situ Synchrotron Techniques

*Jheng-Yi Huang,<sup>a</sup> Kevin Iputera,<sup>a</sup> Yen-Ting Lin,<sup>a</sup> Yuan-Ting Hung,<sup>a</sup> Yu-Shuo Liu,<sup>a</sup> Yun-Ping Chang,<sup>a</sup> Behrouz Bazri,<sup>a,b</sup> Bo-Hong Liu,<sup>c</sup> Da-Hua Wei<sup>\*,b</sup> Bih-Yaw Jin<sup>\*,a</sup> and Ru-Shi Liu<sup>\*,a</sup>*

[a] J. Y. Huang, K. Iputera, Y. T. Lin, Y. T. Hung, Y. S. Liu, Y. P. Chang, Prof. Dr. B. Y. Jin and Prof. Dr. R. S. Liu

Department of Chemistry and Advanced Research Center For Green Materials Science and Technology

National Taiwan University

Taipei 106, Taiwan

E-mails: byjin@ntu.edu.tw and rslu@ntu.edu.tw

[b] B. Bazri and Prof. Dr. D. H. Wei

Institute of Manufacturing Technology and Department of Mechanical Engineering

National Taipei University of Technology

Taipei 106, Taiwan.

[c] Dr. B. H. Liu

National Synchrotron Radiation Research Center

Hsinchu 30076, Taiwan

### Corresponding Authors

\* Da-Hua Wei, Email: dhwei@ntut.edu.tw (D. H. Wei)

\* Bih-Yaw Jin, E-mail: byjin@ntu.edu.tw (B. Y. Jin)

\* Ru-Shi Liu, E-mail: rslu@ntu.edu.tw (R. S. Liu)

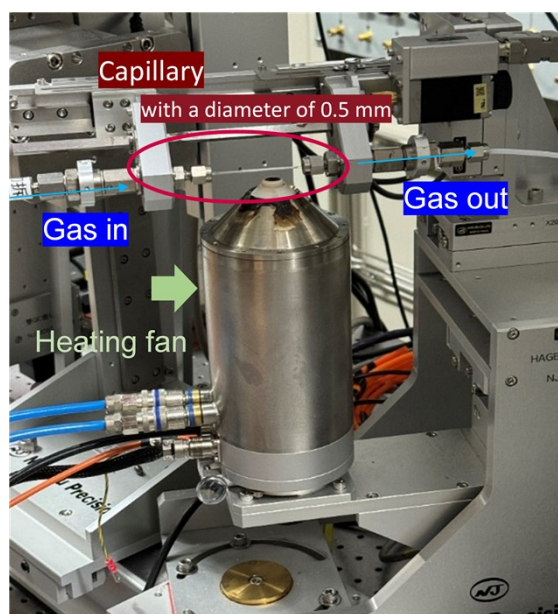

**Fig. S1.** The setup for *in-situ* XAS employs capillaries with a diameter of 0.5 mm in a nitrogen ( $N_2$ ) environment.

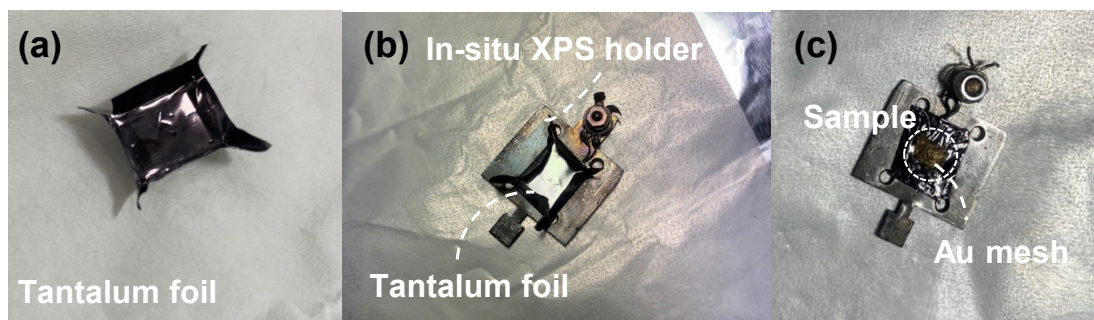

**Fig. S2.** (a) Tantalum (Ta) foil. (b) The *in-situ* XPS holder was welded with Ta foil. (c) The four sides of the holder can be folded to accommodate and secure the Au mesh.

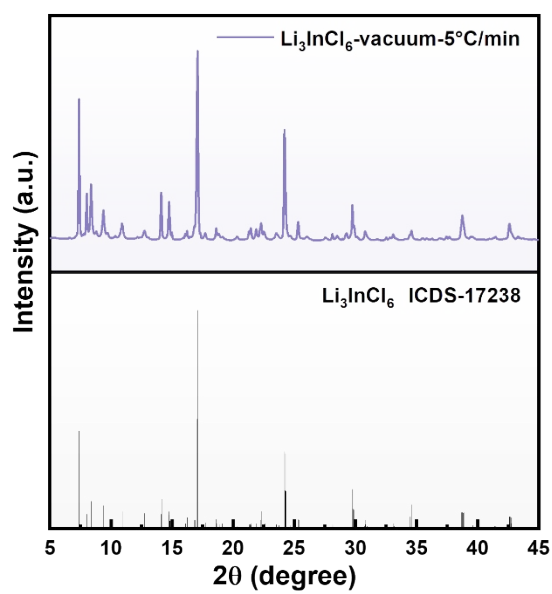

**Fig. S3.** XRD pattern of  $\text{Li}_3\text{InCl}_6$  heat treatment at  $200^\circ\text{C}$  under vacuum for 5 h.

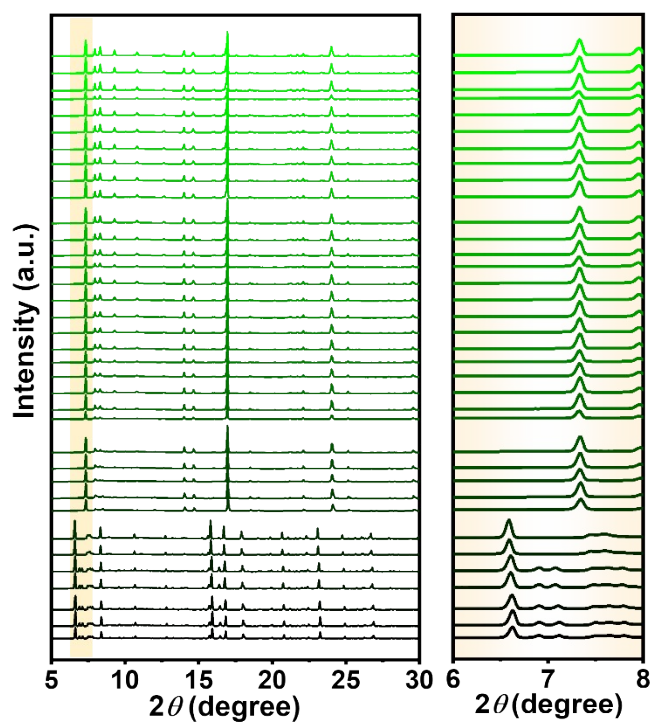

**Fig. S4.** *In-situ* XRD pattern of LIC-2H<sub>2</sub>O heated at a rate of 20°C min<sup>-1</sup> under Ar (1 atm).

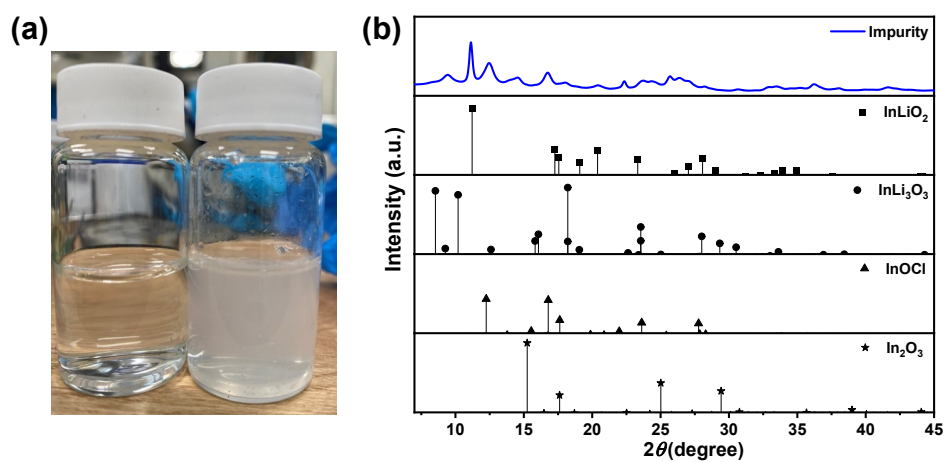

**Fig. S5.** (a) Photo of the precursor solution (left vial) and as-prepared LIC with optimized heat treatment dissolved into deionized water (right vial). (b) XRD pattern of white solid powder separated from the solution in the right-side vial of (a) by centrifugation.

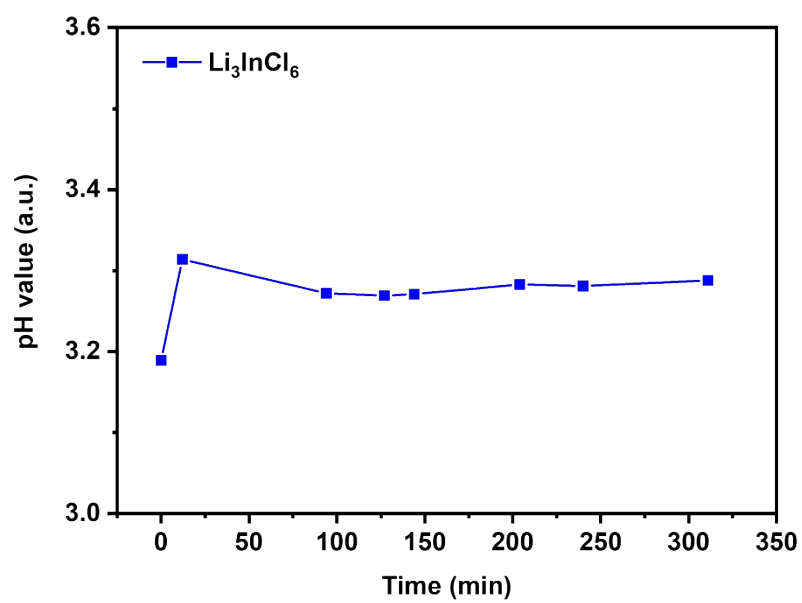

**Fig. S6.** The pH value of the precursor solution during different times.

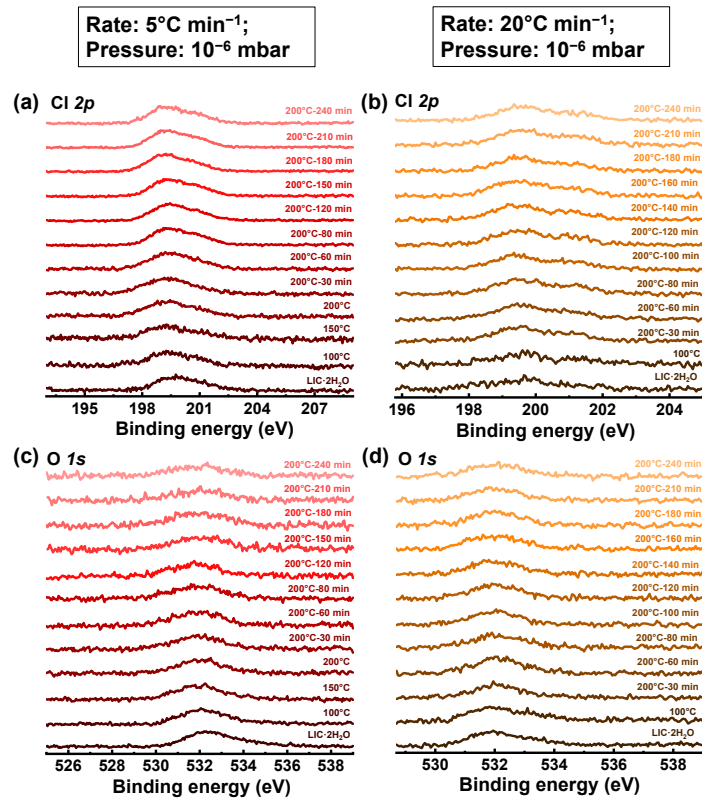

**Fig. S7.** Cl 2p (a,b) and O 1s (c,d) spectra of LIC-2H<sub>2</sub>O throughout the heat treatment. The heat procedures in (a,b) and (c,d) are 5 °C min<sup>-1</sup>-10<sup>-6</sup> mbar and 20 °C min<sup>-1</sup>-10<sup>-6</sup> mbar, respectively.



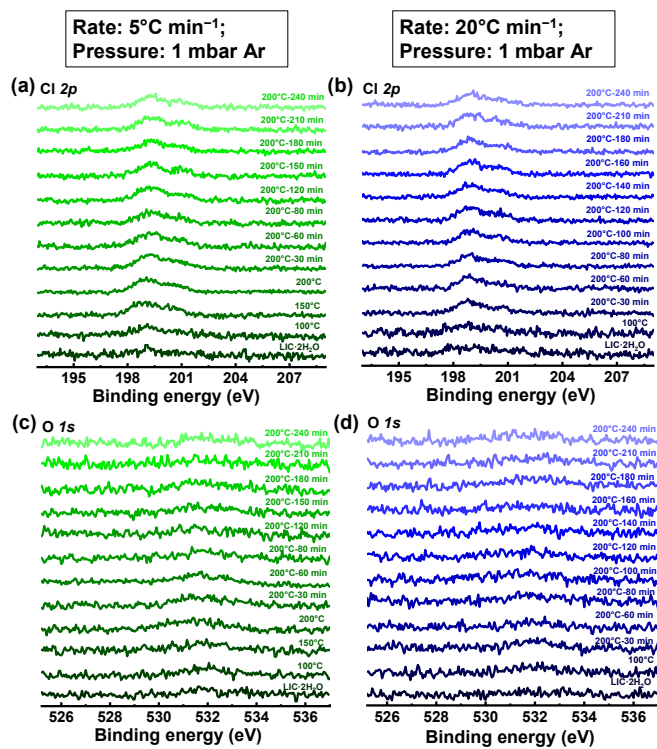

**Fig. S8.** Cl 2p (a,b) and O 1s (c,d) spectra of LIC-2H<sub>2</sub>O throughout the heat treatment. The heat procedures in (a,b) and (c,d) are 5°C min<sup>-1</sup>-1 mbar Ar and 20°C min<sup>-1</sup>-1 mbar Ar, respectively.
